# Supplementary material for: Canine Descemet Stripping Endothelial Keratoplasty with a Tissue Insertion Device: Technique and Long-Term Outcome
Source: Case Rep Vet Med. 2023 Dec 21;2023:7497643. doi: 10.1155/2023/7497643 (PMC10754630; doi:10.1155/2023/7497643)
Supplement: Supplementary Materials — Video 1: in this pull-through technique using a cartridge designed for the canine eye, the trypan blue-stained, endothelium-in graft is brought to the wound and pulled into the eye using microforceps. Given the limited visualization in the eye, an air bubble can be helpful to see the edges of the graft against the cornea. Supplemental File 1: design requirements and development of canine DSEK inserter. Supplemental File 2: cornea transplant preparation: donor identification, tissue recovery, tissue quality assessment, and tissue cutting. Supplemental File 3: perioperative planning: anesthesia and postoperative sedation for serial assessment. Supplemental File 4: link to design files for canine DSEK inserter. [file 7497643.f1.zip]

Archive with 5 entries (5 files):
- 7497643.f1/Supplemental Files 4.docx
- 7497643.f1/Supplemental Protocol 1.docx
- 7497643.f1/Supplemental Protocol 2.docx
- 7497643.f1/Supplemental Protocol 3.docx
- 7497643.f1/Video 1 - TebahLunaInserterInsertion.mp4
